# Supplementary material for: Inhibition enhances spatially-specific calcium encoding of synaptic input patterns in a biologically constrained model
Source: eLife journal article supplement (doi:10.7554/elife.38588), 2018-10-25
Supplement: supp [file elife-38588-supp-v1.zip]

Archive with 6 entries (6 files):
- elife_poa_e38588_Transparent_Reporting_File.pdf
- elife_poa_e38588_Figure_6_figure_supplement_1.pdf
- elife_poa_e38588_Figure_7_figure_supplement_2.pdf
- elife_poa_e38588_Figure_7_figure_supplement_1.pdf
- elife_poa_e38588_Figure_1_figure_supplement_1.pdf
- elife_poa_e38588_Figure_1_figure_supplement_2.pdf
