# Supplementary figures and images for: Inhibition enhances spatially-specific calcium encoding of synaptic input patterns in a biologically constrained model
Source: eLife journal article supplement (doi:10.7554/elife.38588), 2018-10-25

1 Branch,  
16 spines/branch

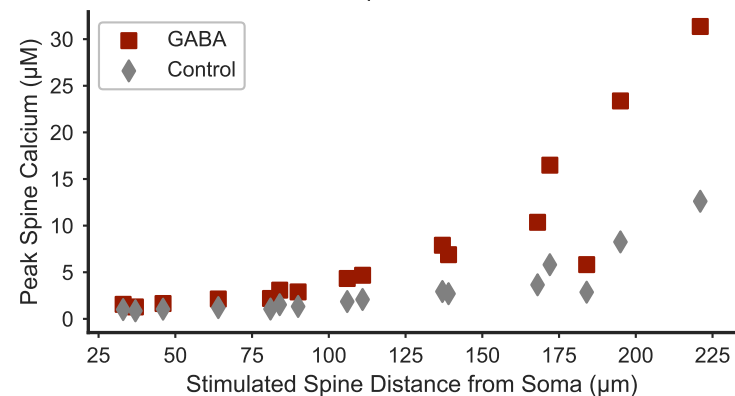

2 Branches,  
16 spines/branch

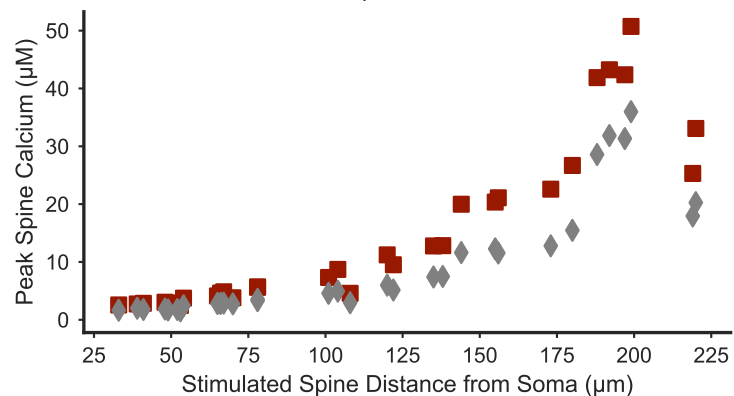

1 Branch,  
32 spines/branch

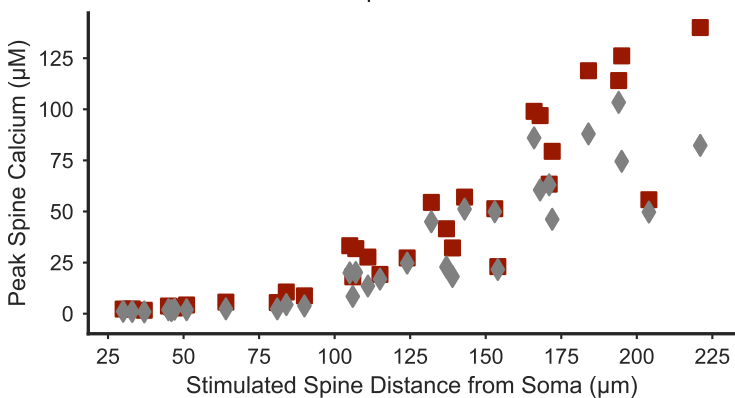

2 Branches,  
32 spines/branch

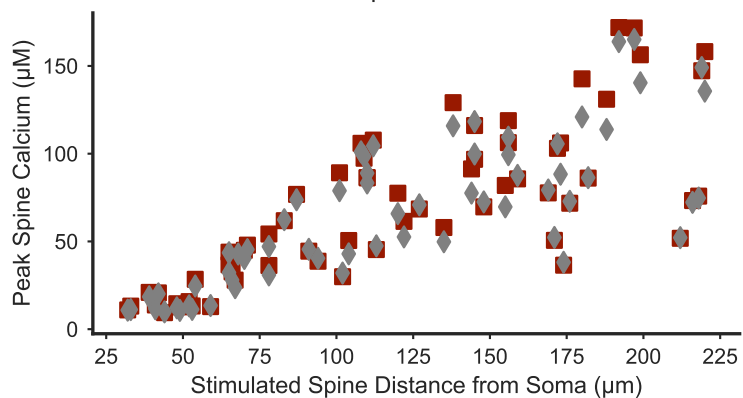

Supplement: supp [file elife-38588-supp-v1.zip › elife_poa_e38588_Figure_6_figure_supplement_1.pdf]

**A**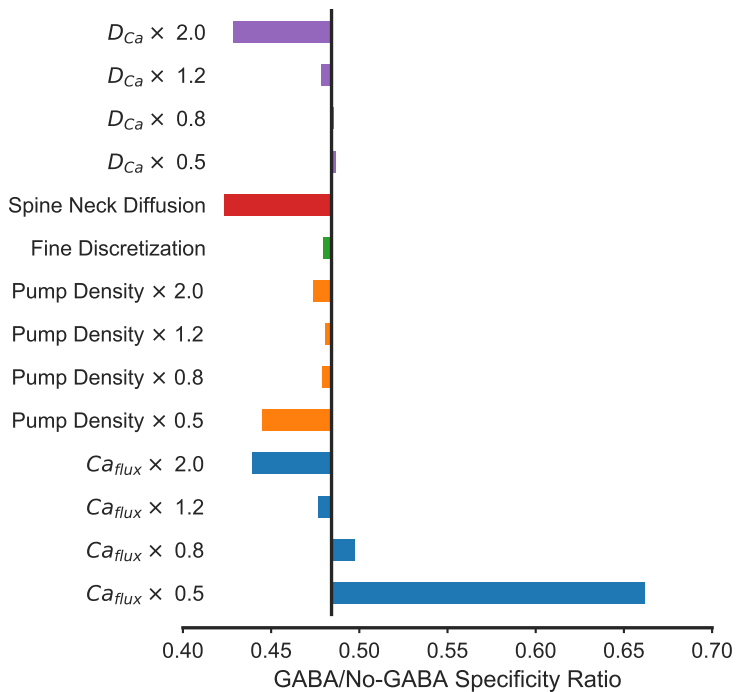**B**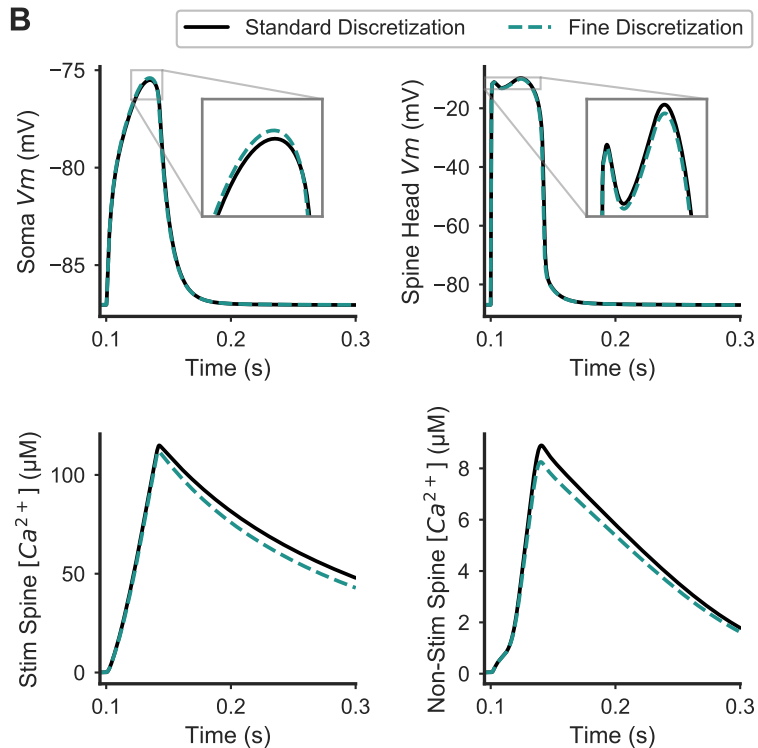

Supplement: supp [file elife-38588-supp-v1.zip › elife_poa_e38588_Figure_7_figure_supplement_2.pdf]

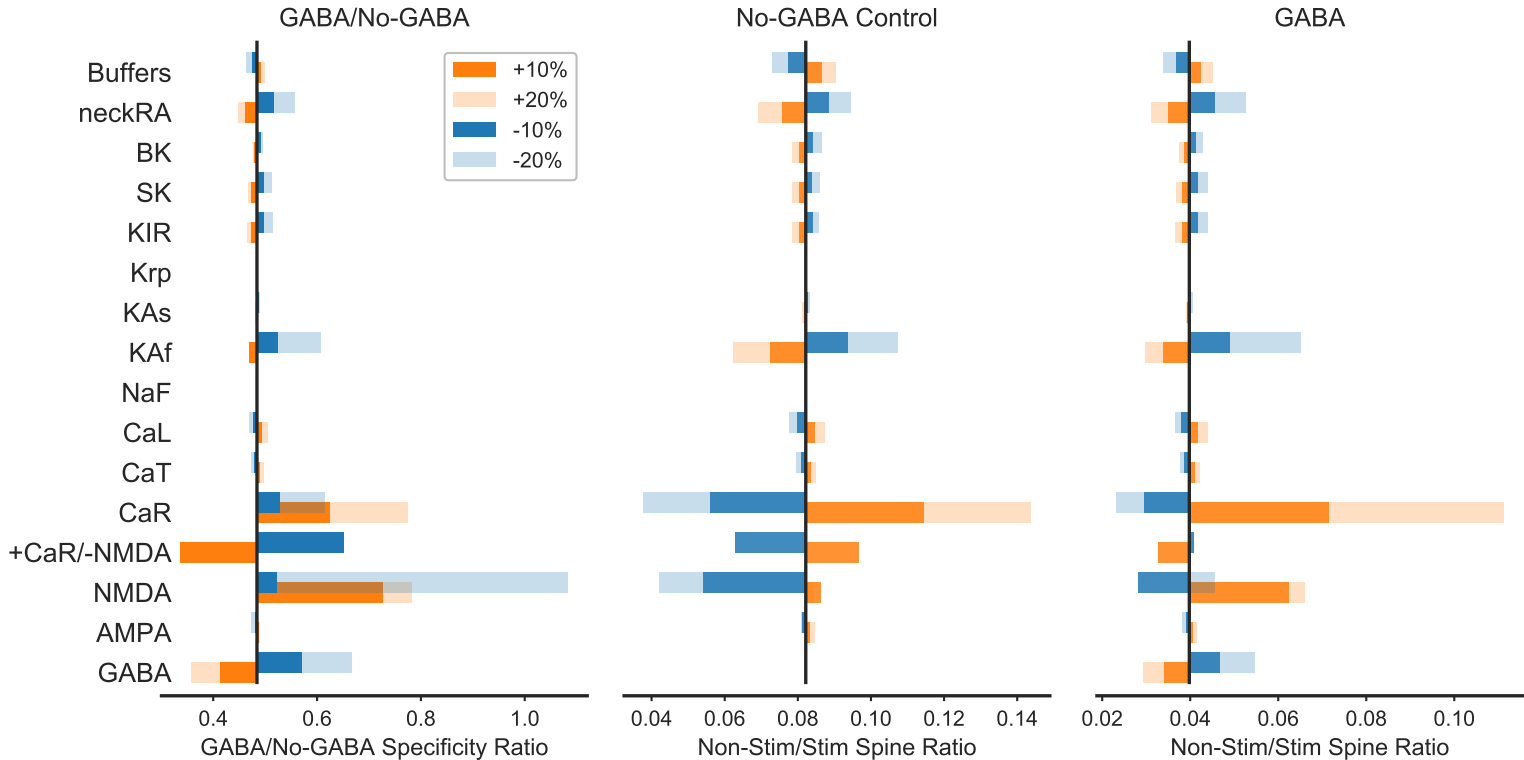

Supplement: supp [file elife-38588-supp-v1.zip › elife_poa_e38588_Figure_7_figure_supplement_1.pdf]

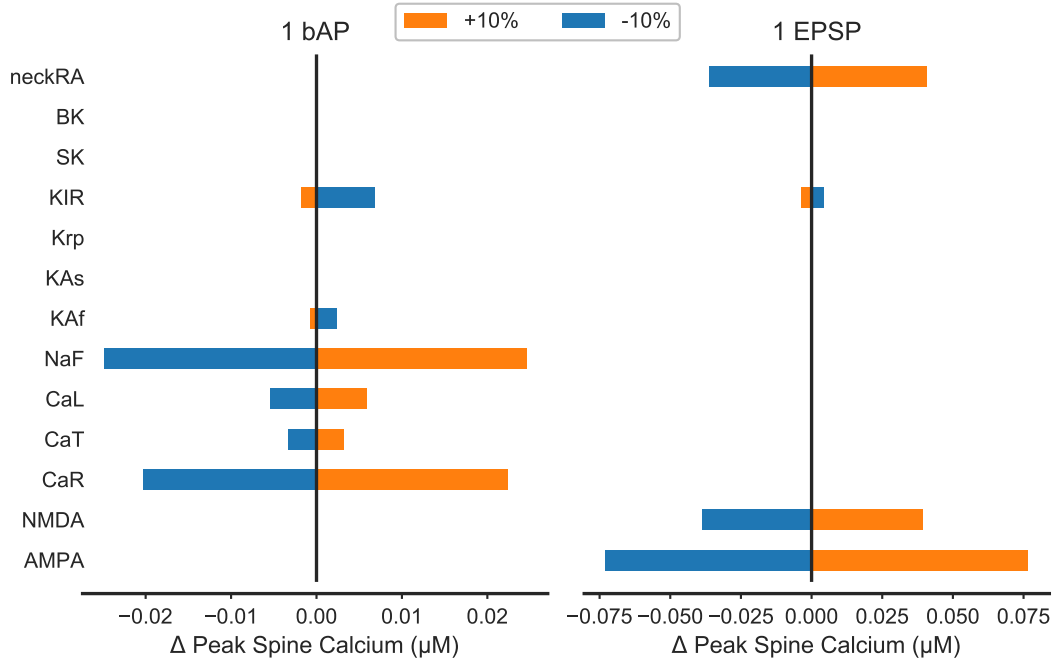

Supplement: supp [file elife-38588-supp-v1.zip › elife_poa_e38588_Figure_1_figure_supplement_1.pdf]

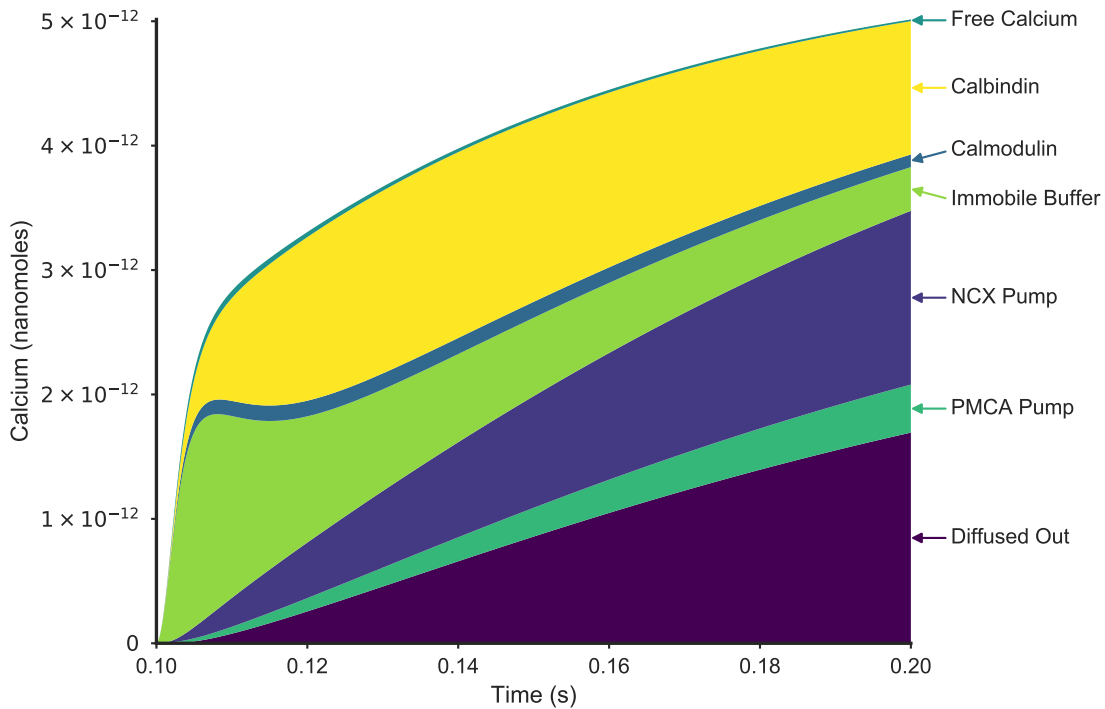

Supplement: supp [file elife-38588-supp-v1.zip › elife_poa_e38588_Figure_1_figure_supplement_2.pdf]
